# Supplementary material for: Nano-propping effect of residual silicas on reversible lithium storage over highly ordered mesoporous SnO2 materials
Source: Royal Society of Chemistry journal article supplement (doi:10.1039/b905743a), 2009-01-01
Supplement: b905743a.pdf [file b905743a.pdf]

## Electronic Supporting Information

### Nano-propping effect of residual silica species on reversible lithium storage over highly ordered mesoporous $\text{SnO}_2$ materials

Jeong Kuk Shon,<sup>a</sup> Hansu Kim,<sup>b</sup> Soo Sung Kong,<sup>a</sup> Seong Hee Hwang,<sup>a</sup> Tae Hee Han,<sup>c</sup> Ji Man Kim,<sup>\*a</sup> Chanho Pak,<sup>\*b</sup> Seokgwang Doo<sup>b</sup> and Hyuk Chang<sup>b</sup>

<sup>a</sup> Department of Chemistry, BK21 School of Chemical Materials Science, Department of Energy Science and SKKU Advanced Institute of Nanotechnology, Sungkyunkwan University, Suwon, 440-746, Republic of Korea. Fax: 82 31 299 4174; Tel: 82 31 290 5930; E-mail: jimankim@skku.edu

<sup>b</sup> Energy Group, Emerging Center, Corporate Technology Operations SAIT, Samsung Electronics Co., Ltd., PO Box 111, Suwon, 440-600, Republic of Korea. Fax: 82 31 280 6884; Tel: 82 31 280 9359; E-mail: chanho.pak@samsung.com

<sup>c</sup> Department of Semiconductor Systems Engineering, School of Information and Communication Engineering, Sungkyunkwan University, Suwon, 440-746, Republic of Korea

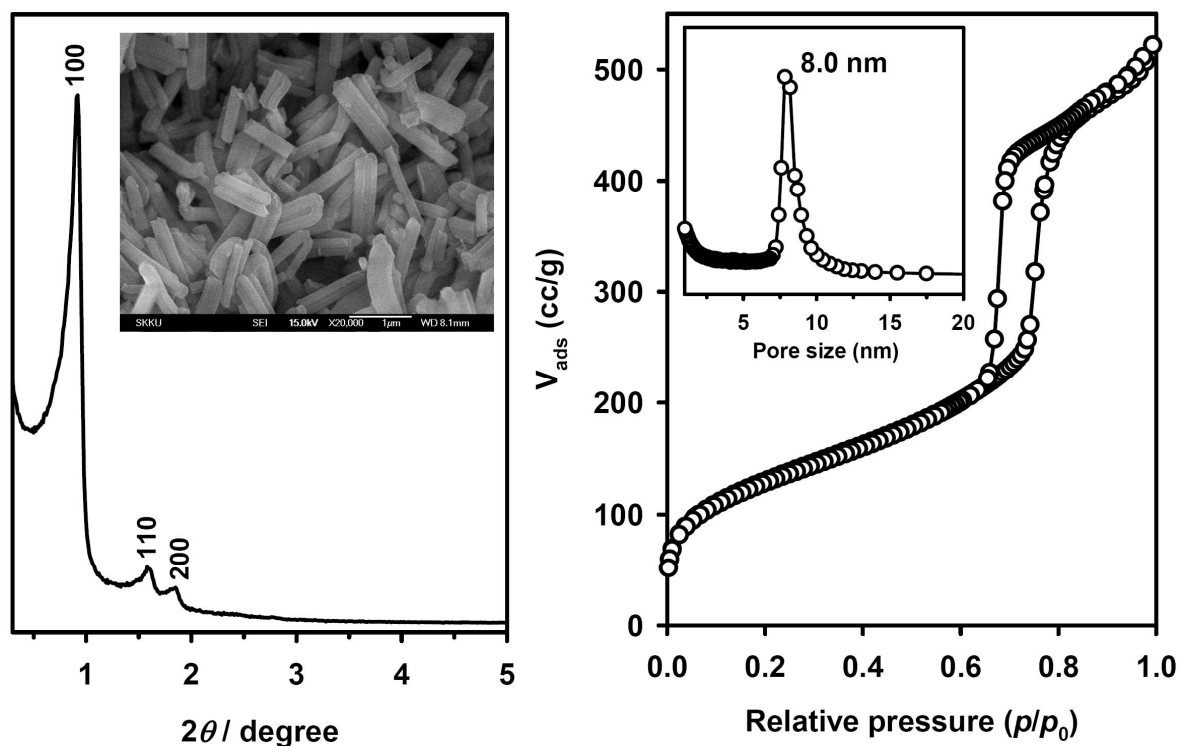

**Fig. S1** XRD pattern, SEM image,  $\text{N}_2$  adsorption-desorption isotherm and BJH pore size distribution curve for the mesoporous silica template, SBA-15.

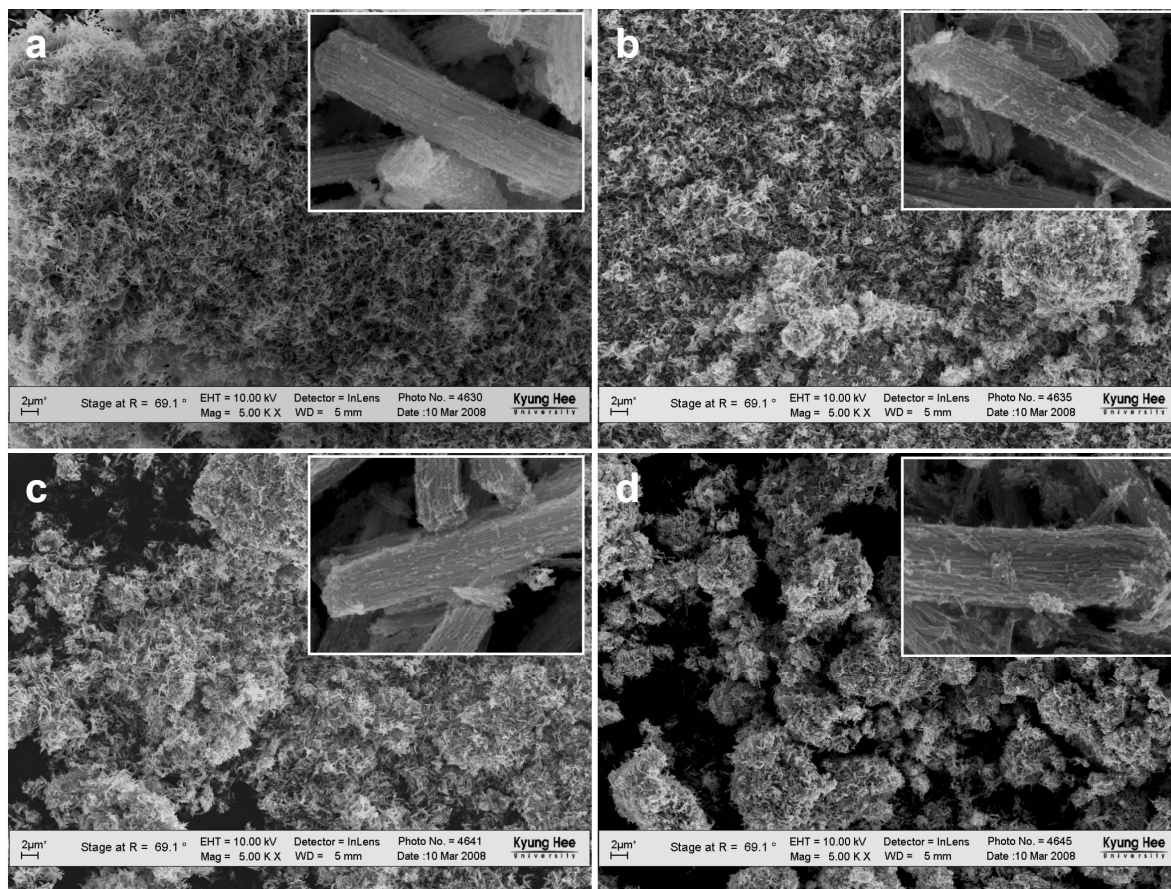

**Fig. S2** SEM images of meso-SnO<sub>2</sub> materials: (a) meso-SnO<sub>2</sub>-0.5SH, (b) meso-SnO<sub>2</sub>-1.0SH, (c) meso-SnO<sub>2</sub>-3.0SH, and (d) meso-SnO<sub>2</sub>-20HF.

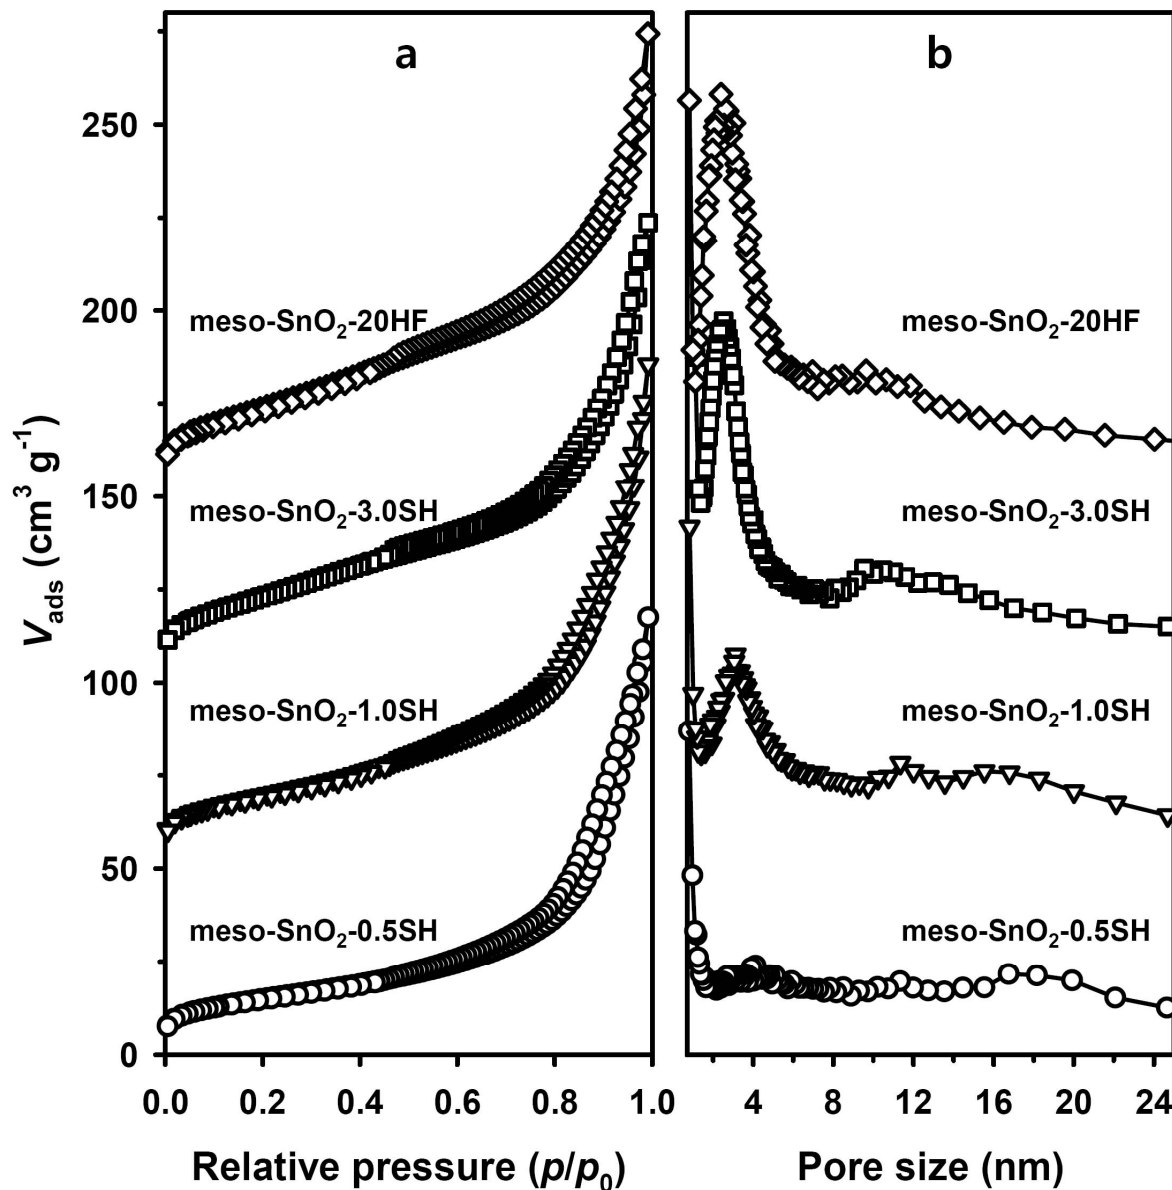

**Fig. S3** (a) N<sub>2</sub> adsorption-desorption isotherms and (b) the corresponding BJH pore size distribution curves for the meso-SnO<sub>2</sub> materials. The isotherms were vertically shifted by 50, 100 and 150  $\text{cm}^3/\text{g}$  STP, respectively, for the clarity of data.

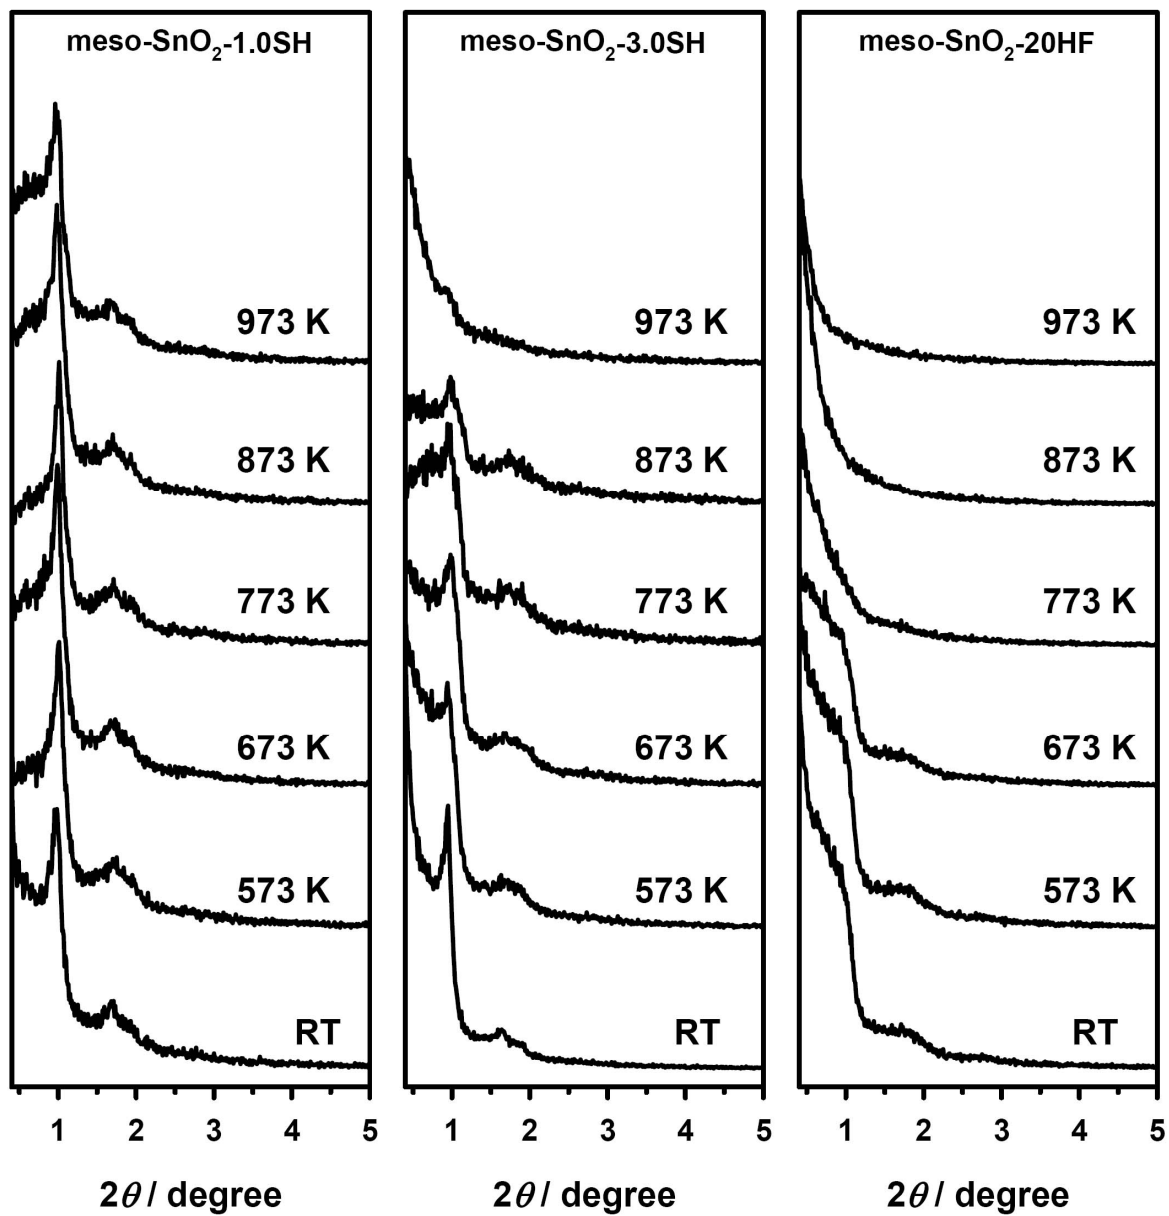

**Fig. S4** XRD patterns of meso-SnO<sub>2</sub> materials after the heat-treatments at the desired temperatures for 2 hrs.

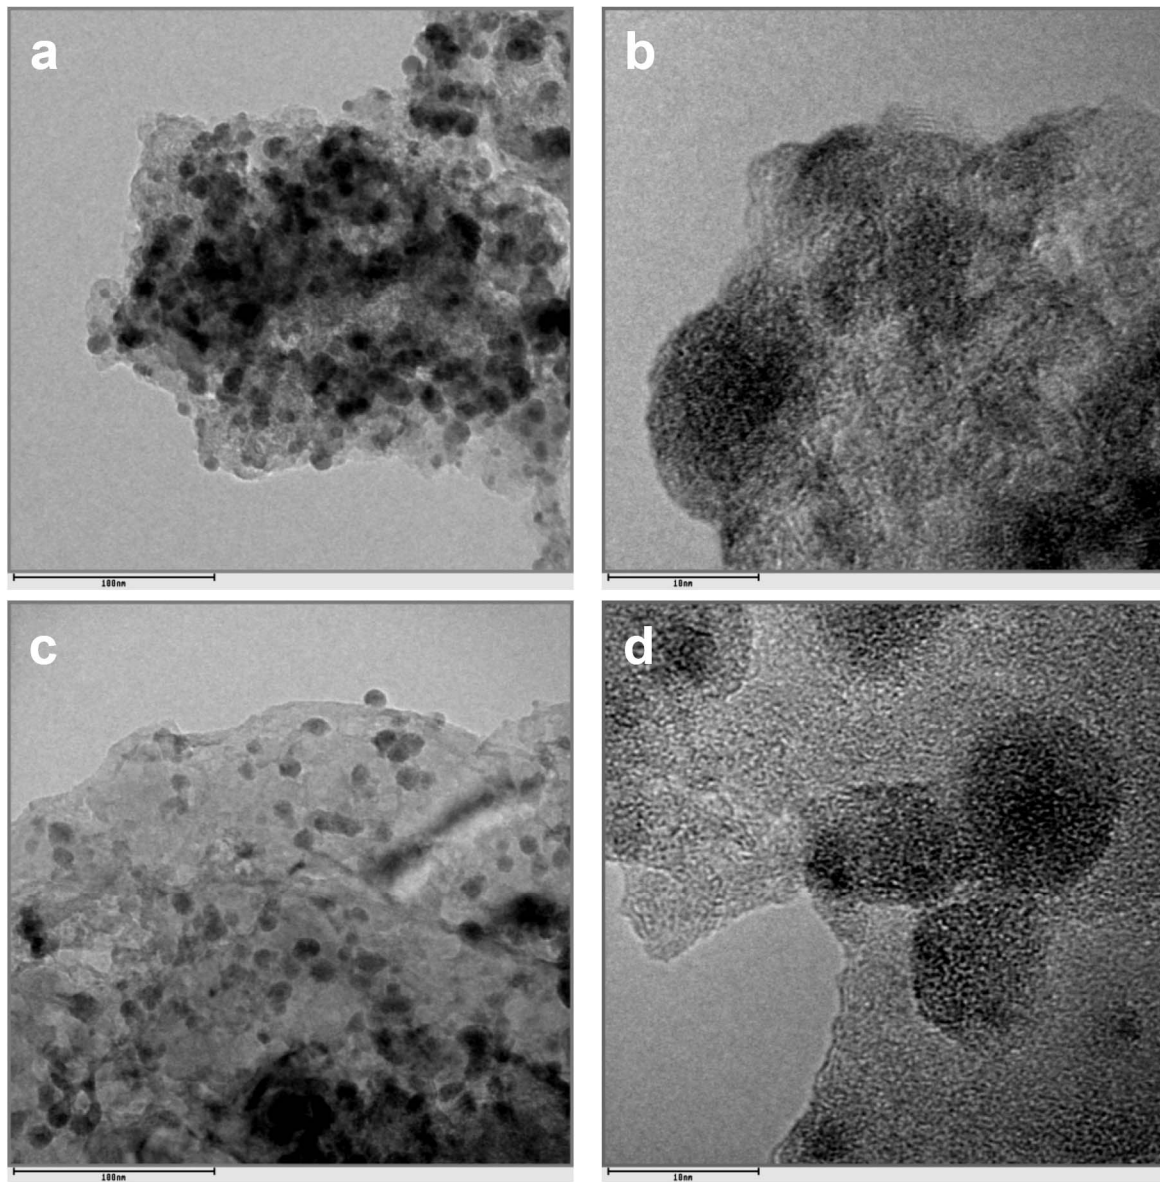

**Fig. S5** TEM images of (a,b) meso-SnO<sub>2</sub>-20HF and (c,d) meso-SnO<sub>2</sub>-3.0SH materials obtained from the electrode after 50<sup>th</sup> cycles.
